# Supplementary material for: The Target Recovery Strategy for Preventing Avalanche Breakdown on Interdependent Community Networks
Source: Hindawi journal article supplement (doi:10.1155/2020/1646930), 2020-09-08
Supplement: f1 [file 1646930.f1.zip]

Archive with 8 entries (8 files):
- 1646930.f1/figureS1a-S1d.pdf
- 1646930.f1/figureS2.pdf
- 1646930.f1/figureS3.pdf
- 1646930.f1/figureS4a-S4d.pdf
- 1646930.f1/figureS5a-S5d.pdf
- 1646930.f1/figureS6a-S6d.pdf
- 1646930.f1/figureS7a-S7d.pdf
- 1646930.f1/figureS8a-S8d.pdf
